# Supplementary material for: Enhanced non-vitreous cryopreservation of immortalized and primary cells by ice-growth inhibiting polymers
Source: PubMed Central journal article supplement (PMC4918798; doi:10.1039/c6bm00129g), 2016-05-06
Supplement: NIHMS68804-supplement-Supporting_Information.pdf [file NIHMS68804-supplement-Supporting_Information.pdf]

## Enhanced Non-Vitreous Cryopreservation of Immortalized and Primary Cells By Ice-Growth Inhibiting Polymers – *Supplementary Information*.

Robert. C. Deller,<sup>ab†</sup> Jeffrey E. Pessin,<sup>cd</sup> Manu Vatish,<sup>e</sup> Daniel A. Mitchell,<sup>f</sup> and Matthew I. Gibson.<sup>a,f\*</sup>

<sup>a</sup>Department of Chemistry, University of Warwick, CV4 7AL, UK.

<sup>b</sup>Molecular Organisation & Assembly of Cells DTC, University of Warwick, CV4 7AL, UK.

<sup>c</sup>Department of Medicine, Albert Einstein College of Medicine, Bronx, New York, USA.

<sup>d</sup>Department of Molecular Pharmacology, Albert Einstein College of Medicine, Bronx, New York, USA.

<sup>e</sup>Nuffield Department of Obstetrics & Gynaecology, University of Oxford, OX3 9DU, UK.

<sup>f</sup>Warwick Medical School, University of Warwick, CV4 7AL, UK.

\*Denotes corresponding author.

†Current address: School of Cellular & Molecular Medicine, University of Bristol, Bristol, BS8 1TD, UK.

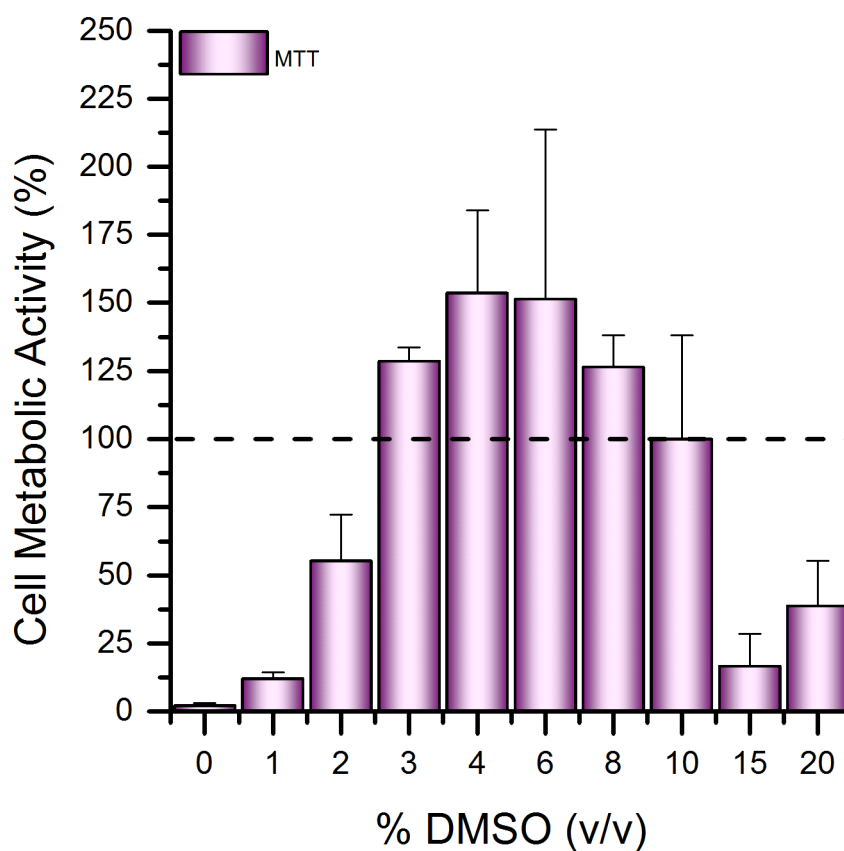

**Supplementary Figure 1.** Optimizing DMSO concentration during cryopreservation. Cell viability (MTT) of A549 cells post cryopreservation with various DMSO concentrations. All data from at least 3 repeats and errors bars represent  $\pm$  standard deviation.
